# Supplementary material for: Public health measures to reduce the risk of SARS-CoV-2 transmission in Canada during the early days of the COVID-19 pandemic: a scoping review
Source: HighWire-hosted journal article supplement (doi:10.1136/bmjopen-2020-046177), 2021-03-01
Supplement: bmjopen-2020-046177supp001_data_supplement.pdf [file bmjopen-2020-046177supp001_data_supplement.pdf]

**SUPPLEMENTAL FILE 1: DATA AND INFORMATION SOURCES BY JURISDICTION**

| <b>Jurisdiction/Organization</b> | <b>Website</b>                                                                                                                                                                                                                              |
|----------------------------------|---------------------------------------------------------------------------------------------------------------------------------------------------------------------------------------------------------------------------------------------|
| Federal                          | <a href="https://www.canada.ca/en/public-health/services/diseases/2019-novel-coronavirus-infection/canadas-reponse.html">https://www.canada.ca/en/public-health/services/diseases/2019-novel-coronavirus-infection/canadas-reponse.html</a> |
| British Columbia                 | <a href="https://news.gov.bc.ca/">https://news.gov.bc.ca/</a>                                                                                                                                                                               |
| Alberta                          | <a href="https://www.alberta.ca/announcements.cfm">https://www.alberta.ca/announcements.cfm</a>                                                                                                                                             |
| Saskatchewan                     | <a href="https://www.saskatchewan.ca/government/news-and-media">https://www.saskatchewan.ca/government/news-and-media</a>                                                                                                                   |
| Manitoba                         | <a href="https://news.gov.mb.ca/news/index.html">https://news.gov.mb.ca/news/index.html</a>                                                                                                                                                 |
| Ontario                          | <a href="https://news.ontario.ca/archive/en">https://news.ontario.ca/archive/en</a>                                                                                                                                                         |
| Quebec                           | <a href="http://www.fil-information.gouv.qc.ca/Pages/RechercheAvancee.aspx?idMenuItem=8&amp;lang=en">http://www.fil-information.gouv.qc.ca/Pages/RechercheAvancee.aspx?idMenuItem=8&amp;lang=en</a>                                         |
| New Brunswick                    | <a href="https://www2.gnb.ca/content/gnb/en/news/recent_news.html">https://www2.gnb.ca/content/gnb/en/news/recent_news.html</a>                                                                                                             |
| Nova Scotia                      | <a href="https://novascotia.ca/news/">https://novascotia.ca/news/</a>                                                                                                                                                                       |
| Prince Edward Island             | <a href="https://www.princeedwardisland.ca/en/news">https://www.princeedwardisland.ca/en/news</a>                                                                                                                                           |
| Newfoundland & Labrador          | <a href="https://www.gov.nl.ca/releases/">https://www.gov.nl.ca/releases/</a>                                                                                                                                                               |
| Nunavut                          | <a href="https://www.gov.nu.ca/news">https://www.gov.nu.ca/news</a>                                                                                                                                                                         |
| Northwest Territories            | <a href="https://www.gov.nt.ca/newsroom">https://www.gov.nt.ca/newsroom</a>                                                                                                                                                                 |
| Yukon Territory                  | <a href="https://yukon.ca/news">https://yukon.ca/news</a>                                                                                                                                                                                   |
