# Supplementary material for: Public health measures to reduce the risk of SARS-CoV-2 transmission in Canada during the early days of the COVID-19 pandemic: a scoping review
Source: HighWire-hosted journal article supplement (doi:10.1136/bmjopen-2020-046177), 2021-03-01
Supplement: bmjopen-2020-046177supp002_data_supplement.pdf [file bmjopen-2020-046177supp002_data_supplement.pdf]

**SUPPLEMENTAL FILE 2: DATA ELEMENTS EXTRACTED ON PUBLIC HEALTH MEASURES ISSUED BY FEDERAL AND PROVINCIAL/TERRITORIES GOVERNMENTS**

| Data Elements                                                                  | Description                                                                                                                                                                                                                                                                                                                                                                                                                                                                                                                                                                                                                                        |
|--------------------------------------------------------------------------------|----------------------------------------------------------------------------------------------------------------------------------------------------------------------------------------------------------------------------------------------------------------------------------------------------------------------------------------------------------------------------------------------------------------------------------------------------------------------------------------------------------------------------------------------------------------------------------------------------------------------------------------------------|
| Name of jurisdiction                                                           | Federal (including populations covered under the federal jurisdiction: Indigenous People of Canada, federal offenders, the Canadian Armed Forces, veterans, and refugees)<br>British Columbia<br>Alberta<br>Saskatchewan<br>Manitoba<br>Ontario<br>Quebec<br>Nova Scotia<br>New Brunswick<br>Prince Edward Island<br>Newfoundland and Labrador<br>Yukon<br>Northwest Territories<br>Nunavut                                                                                                                                                                                                                                                        |
| Description of each PH measure issued by provinces/territories                 | Narrative description                                                                                                                                                                                                                                                                                                                                                                                                                                                                                                                                                                                                                              |
| Category of PH measure ( <i>available in dropdown list</i> ) (PHAC categories) | Individual measures<br>- Hand hygiene<br>- Respiratory etiquette<br>- Environmental cleaning (home/personal environment)<br>- Voluntary self-isolation and home quarantine<br>- Use of masks<br>Community measures<br>- Environmental cleaning (public spaces)<br>- Physical distancing measures<br>- School closures<br>- University closures<br>- Childcare closures<br>- Cancellation of mass gatherings<br>- Assisted living facilities<br>- Workplace (remote work)<br>- Health care settings<br>- Community/Faith-based organizations<br>- Retail/commerce restrictions<br>- Remote and isolated communities<br>- Border and travel measures |

| Data Elements                                                | Description                                                                                                                                                                                                                                                                                                                                                                                                                                                                                                                                                                                                                                                                           |
|--------------------------------------------------------------|---------------------------------------------------------------------------------------------------------------------------------------------------------------------------------------------------------------------------------------------------------------------------------------------------------------------------------------------------------------------------------------------------------------------------------------------------------------------------------------------------------------------------------------------------------------------------------------------------------------------------------------------------------------------------------------|
|                                                              | <ul style="list-style-type: none"> <li>- Case and contact or tracing management measures</li> <li>- Justice services</li> <li>- Government services</li> <li>- Social services</li> </ul>                                                                                                                                                                                                                                                                                                                                                                                                                                                                                             |
| Date(s) of PH measure announcement                           | Day and month                                                                                                                                                                                                                                                                                                                                                                                                                                                                                                                                                                                                                                                                         |
| Level of implementation                                      | Mandatory (Yes/No), Recommended (Yes/No), Unclear (Yes/No)                                                                                                                                                                                                                                                                                                                                                                                                                                                                                                                                                                                                                            |
| Target population                                            | <ul style="list-style-type: none"> <li>General public (Yes/No)</li> <li>Physicians/health care workers (Yes/No)</li> <li>Adults (17-65 years old) (Yes/No)</li> <li>Children (17 years and under) (Yes/No)</li> <li>Elderly (Seniors, &gt;65 years old) (Yes/No)</li> <li>Pregnant women (Yes/No)</li> <li>Chronic disease populations (Yes/No)</li> <li>Other (Specify)</li> </ul>                                                                                                                                                                                                                                                                                                   |
| Socially disadvantaged population targeted by the PH measure | Yes/No                                                                                                                                                                                                                                                                                                                                                                                                                                                                                                                                                                                                                                                                                |
| If yes, check whether any of the following (dropdown list):  | <ul style="list-style-type: none"> <li>- Place of residence (i.e., urban, rural)</li> <li>- Race/ethnicity/culture/language</li> <li>- Occupation</li> <li>- Gender and sexual orientation</li> <li>- Religion background</li> <li>- Education</li> <li>- Socioeconomic status (including income, housing, single-parent family, food security)</li> <li>- Social capital and networks (e.g., married or common-law partner, neighbourhood characteristics, community supports)</li> <li>- Age (range)</li> <li>- Migration status</li> <li>- Disability</li> </ul> <p>**long term care home/retirement residence<br/> **prisons<br/> **cruise ship<br/> **Indigenous communities</p> |

P/T=Provincial/territorial
