# Supplementary material for: Public health measures to reduce the risk of SARS-CoV-2 transmission in Canada during the early days of the COVID-19 pandemic: a scoping review
Source: HighWire-hosted journal article supplement (doi:10.1136/bmjopen-2020-046177), 2021-03-01
Supplement: bmjopen-2020-046177supp003_data_supplement.pdf [file bmjopen-2020-046177supp003_data_supplement.pdf]

## SUPPLEMENTAL FILE 3: SUMMARY OF PUBLIC HEALTH MEASURES BY JURISDICTION

| Province/<br>Territory | Category of related public health measures (n) | Date of initial public health measurement announcement | Level of implementation (n)                                                                  | Target Population (n)                                                                                                                                              |
|------------------------|------------------------------------------------|--------------------------------------------------------|----------------------------------------------------------------------------------------------|--------------------------------------------------------------------------------------------------------------------------------------------------------------------|
| Federal                | <b>PUBLIC COMMUNICATION AND EDUCATION</b>      |                                                        |                                                                                              |                                                                                                                                                                    |
|                        | Hand hygiene (1)                               | April 9                                                | Recommended (1)                                                                              | General public (1)                                                                                                                                                 |
|                        | Respiratory etiquette (1)                      | April 9                                                | Recommended (1)                                                                              | General public (1)                                                                                                                                                 |
|                        | Voluntary self-isolation (4)                   | March 16                                               | <ul style="list-style-type: none"> <li>• Mandatory (1)</li> <li>• Recommended (3)</li> </ul> | General public (4)                                                                                                                                                 |
|                        | Voluntary home quarantine (4)                  | March 16                                               | <ul style="list-style-type: none"> <li>• Mandatory (1)</li> <li>• Recommended (3)</li> </ul> | General public (4)                                                                                                                                                 |
|                        | Use of masks (4)                               | March 18                                               | Recommended (4)                                                                              | General public (4)                                                                                                                                                 |
|                        | <b>PUBLIC HEALTH ORDERS</b>                    |                                                        |                                                                                              |                                                                                                                                                                    |
|                        | Environmental cleaning (public spaces) (1)     | March 18                                               | Mandatory (1)                                                                                | General public (1)                                                                                                                                                 |
|                        | Assisted living facilities (1)                 | April 12                                               | Recommended (1)                                                                              | Seniors (>65 years old) (1)                                                                                                                                        |
|                        | Health care settings (2)                       | March 18                                               | <ul style="list-style-type: none"> <li>• Mandatory (1)</li> <li>• Recommended (1)</li> </ul> | Physicians and health care workers (2)                                                                                                                             |
|                        | Government services (1)                        | April 7                                                | Mandatory (1)                                                                                | Indigenous peoples (1)                                                                                                                                             |
|                        | Border and travel measures (21)                | February 3                                             | Mandatory (21)                                                                               | General public (21)                                                                                                                                                |
|                        | Case and contact management measures (1)       | February 9                                             | Mandatory (1)                                                                                | General public (1)                                                                                                                                                 |
| BC                     | <b>PUBLIC COMMUNICATION AND EDUCATION</b>      |                                                        |                                                                                              |                                                                                                                                                                    |
|                        | Hand hygiene (5)                               | January 31                                             | <ul style="list-style-type: none"> <li>• Mandatory (4)</li> <li>• Recommended (1)</li> </ul> | <ul style="list-style-type: none"> <li>• General public (3)</li> <li>• Adults (17 to 65 years old) (1)</li> <li>• Children (17 years old and under) (1)</li> </ul> |
|                        | Respiratory etiquette (3)                      | January 31                                             | <ul style="list-style-type: none"> <li>• Mandatory (1)</li> <li>• Recommended (2)</li> </ul> | <ul style="list-style-type: none"> <li>• General public (2)</li> <li>• Children (17 years old and under) (1)</li> </ul>                                            |
|                        | Environment cleaning of individual spaces (3)  | February 29                                            | Recommended (3)                                                                              | <ul style="list-style-type: none"> <li>• General public (1)</li> <li>• Adults (17 to 65 years old) (2)</li> </ul>                                                  |
|                        | Voluntary self-isolation (9)                   | January 31                                             | <ul style="list-style-type: none"> <li>• Mandatory (3)</li> <li>• Recommended (6)</li> </ul> | <ul style="list-style-type: none"> <li>• General public (8)</li> <li>• Adults (17 to 65 years old) (1)</li> </ul>                                                  |
|                        | Voluntary home quarantine (9)                  | January 31                                             | <ul style="list-style-type: none"> <li>• Mandatory (3)</li> </ul>                            | <ul style="list-style-type: none"> <li>• General public (8)</li> </ul>                                                                                             |

| Province/<br>Territory | Category of related public health measures (n) | Date of initial public health measurement announcement | Level of implementation (n)          | Target Population (n)                                                                             |
|------------------------|------------------------------------------------|--------------------------------------------------------|--------------------------------------|---------------------------------------------------------------------------------------------------|
|                        |                                                |                                                        | • Recommended (6)                    | • Adults (17 to 65 years old) (1)                                                                 |
|                        | <b>PUBLIC HEALTH ORDERS</b>                    |                                                        |                                      |                                                                                                   |
|                        | Environmental cleaning of public spaces (2)    | March 24                                               | • Mandatory (1)<br>• Recommended (1) | General public, including Indigenous peoples (2)                                                  |
|                        | Physical distancing measures (9)               | March 3                                                | • Mandatory (3)<br>• Recommended (6) | General public (9)                                                                                |
|                        | School closures (1)                            | March 17                                               | Mandatory (1)                        | Children (<17 years old) (1)                                                                      |
|                        | Cancellation of mass gatherings (5)            | March 3                                                | • Mandatory (3)<br>• Recommended (2) | • General public (4)<br>• Adults (17 to 65 years old) (1)                                         |
|                        | Assisted living facilities (2)                 | March 11                                               | • Mandatory (1)<br>• Recommended (1) | Seniors (>65 years old) (2)                                                                       |
|                        | Workplace (remote work) (2)                    | February 29                                            | Recommended (2)                      | Adults (17 to 65 years old) (2)                                                                   |
|                        | Health care settings (3)                       | March 16                                               | • Mandatory (1)<br>• Recommended (2) | • Physicians and healthcare workers (1)<br>• Physical illness/chronic populations (2)             |
|                        | Community/faith-based organizations (1)        | March 7                                                | Recommended (1)                      | General public (1)                                                                                |
|                        | Retail and commerce restrictions (6)           | March 16                                               | • Mandatory (4)<br>• Recommended (2) | • General public (4)<br>• Adults (17 to 65 years old) (2)                                         |
|                        | Border and travel measures (4)                 | February 3                                             | Recommended (4)                      | General public (4)                                                                                |
|                        | Case and contact management measures (6)       | February 3                                             | • Mandatory (4)<br>• Recommended (2) | • General public (5)<br>• Adults (17 to 65 years old) (1)                                         |
| AB                     | <b>PUBLIC COMMUNICATION AND EDUCATION</b>      |                                                        |                                      |                                                                                                   |
|                        | Hand hygiene (1)                               | March 17                                               | Mandatory (1)                        | General public (1)                                                                                |
|                        | Voluntary self-isolation (10)                  | March 18                                               | • Mandatory (3)<br>• Recommended (7) | • General public (8)<br>• Children (<17 years old) (1)<br>• Seniors (>65 years old) (1)           |
|                        | Voluntary home quarantine (9)                  | March 18                                               | • Mandatory (2)<br>• Recommended (7) | General public (9)                                                                                |
|                        | Use of masks (6)                               | March 28                                               | • Mandatory (2)<br>• Recommended (4) | • General public (1)<br>• Physicians and health care workers (4)<br>• Seniors (>65 years old) (1) |

| Province/<br>Territory | Category of related public health measures (n) | Date of initial public health measurement announcement | Level of implementation (n)                                                                   | Target Population (n)                                                                                                                                                                                                                                             |
|------------------------|------------------------------------------------|--------------------------------------------------------|-----------------------------------------------------------------------------------------------|-------------------------------------------------------------------------------------------------------------------------------------------------------------------------------------------------------------------------------------------------------------------|
|                        | <b>PUBLIC HEALTH ORDERS</b>                    |                                                        |                                                                                               |                                                                                                                                                                                                                                                                   |
|                        | Environmental cleaning (public spaces) (9)     | March 13                                               | <ul style="list-style-type: none"> <li>• Mandatory (8)</li> <li>• Recommended (1)</li> </ul>  | General public (9)                                                                                                                                                                                                                                                |
|                        | Physical distancing (4)                        | March 20                                               | <ul style="list-style-type: none"> <li>• Mandatory (1)</li> <li>• Recommended (3)</li> </ul>  | <ul style="list-style-type: none"> <li>• General public (3)</li> <li>• Seniors (&gt;65 years old) (1)</li> </ul>                                                                                                                                                  |
|                        | School closures (2)                            | March 15                                               | Mandatory (2)                                                                                 | Children (<17 years old) (2)                                                                                                                                                                                                                                      |
|                        | University closures (1)                        | April 30                                               | Recommended (1)                                                                               | Adults (17 to 65 years old) (1)                                                                                                                                                                                                                                   |
|                        | Childcare closures (3)                         | March 15                                               | Mandatory (3)                                                                                 | Children (<17 years old) (3)                                                                                                                                                                                                                                      |
|                        | Cancellation of mass gatherings (5)            | March 12                                               | Mandatory (5)                                                                                 | General public (5)                                                                                                                                                                                                                                                |
|                        | Assisted living facilities (10)                | March 15                                               | <ul style="list-style-type: none"> <li>• Mandatory (6)</li> <li>• Recommended (4)</li> </ul>  | <ul style="list-style-type: none"> <li>• Children (&lt;17 years old) (1)</li> <li>• Seniors (&gt;65 years old) (6)</li> <li>• Physical illness/chronic disease populations (2)</li> <li>• Population with mental health illness (1)</li> </ul>                    |
|                        | Workplace (remote work) (1)                    | March 20                                               | Mandatory (1)                                                                                 | Adults (17 to 65 years old) (1)                                                                                                                                                                                                                                   |
|                        | Health care settings (13)                      | March 18                                               | <ul style="list-style-type: none"> <li>• Mandatory (11)</li> <li>• Recommended (2)</li> </ul> | <ul style="list-style-type: none"> <li>• General public (4)</li> <li>• Physicians and health care workers (2)</li> <li>• Children (&lt;17 years old) (1)</li> <li>• Seniors (&gt;65 years old) (2)</li> <li>• Physical illness/chronic populations (4)</li> </ul> |
|                        | Community/faith organizations (1)              | March 15                                               | Mandatory (1)                                                                                 | General public (1)                                                                                                                                                                                                                                                |
|                        | Retail/commerce restrictions (6)               | March 17                                               | Mandatory (6)                                                                                 | <ul style="list-style-type: none"> <li>• General public (3)</li> <li>• Adults (17 to 65 years old) (3)</li> </ul>                                                                                                                                                 |
|                        | Border and travel measures (3)                 | March 12                                               | Mandatory (3)                                                                                 | General public (3)                                                                                                                                                                                                                                                |
|                        | Case and contact management measures (1)       | April 12                                               | Mandatory (1)                                                                                 | General public (1)                                                                                                                                                                                                                                                |
|                        | Justice services (3)                           | March 16                                               | Mandatory (3)                                                                                 | <ul style="list-style-type: none"> <li>• General public (2)</li> <li>• Inmates (1)</li> </ul>                                                                                                                                                                     |
|                        | Government services (6)                        | March 17                                               | Mandatory (6)                                                                                 | <ul style="list-style-type: none"> <li>• General public (5)</li> <li>• Seniors (&gt;65 years old) (1)</li> </ul>                                                                                                                                                  |

| Province/<br>Territory | Category of related public health measures (n) | Date of initial public health measurement announcement | Level of implementation (n)                                                                  | Target Population (n)                                                                                                                                              |
|------------------------|------------------------------------------------|--------------------------------------------------------|----------------------------------------------------------------------------------------------|--------------------------------------------------------------------------------------------------------------------------------------------------------------------|
|                        | Social services (1)                            | March 21                                               | Mandatory (1)                                                                                | Homeless population (1)                                                                                                                                            |
| SK                     | <b>PUBLIC COMMUNICATION AND EDUCATION</b>      |                                                        |                                                                                              |                                                                                                                                                                    |
|                        | Voluntary self-isolation (5)                   | March 20                                               | Mandatory (5)                                                                                | General public (5)                                                                                                                                                 |
|                        | Voluntary home quarantine (5)                  | March 20                                               | Mandatory (5)                                                                                | General public (5)                                                                                                                                                 |
|                        | Use of masks (1)                               | April 17                                               | Mandatory (1)                                                                                | Physicians and health care workers (1)                                                                                                                             |
|                        | <b>PUBLIC HEALTH ORDERS</b>                    |                                                        |                                                                                              |                                                                                                                                                                    |
|                        | Environmental cleaning (public spaces) (6)     | April 23                                               | Mandatory (6)                                                                                | General public (6)                                                                                                                                                 |
|                        | Physical distancing measures (5)               | March 19                                               | <ul style="list-style-type: none"> <li>• Mandatory (3)</li> <li>• Recommended (2)</li> </ul> | <ul style="list-style-type: none"> <li>• General public (3)</li> <li>• Physicians and healthcare workers (1)</li> <li>• Adults (17 to 65 years old) (1)</li> </ul> |
|                        | School closures (2)                            | March 17                                               | Mandatory (2)                                                                                | Children (<17 years old) (2)                                                                                                                                       |
|                        | Childcare closures (3)                         | March 23                                               | Mandatory (3)                                                                                | Children (<17 years old) (3)                                                                                                                                       |
|                        | Cancellation of mass gatherings (6)            | March 17                                               | Mandatory (6)                                                                                | General public (6)                                                                                                                                                 |
|                        | Assisted living facilities (2)                 | March 17                                               | Mandatory (2)                                                                                | <ul style="list-style-type: none"> <li>• General public (1)</li> <li>• Seniors (&gt;65 years old) (1)</li> </ul>                                                   |
|                        | Healthcare settings (6)                        | March 23                                               | <ul style="list-style-type: none"> <li>• Mandatory (5)</li> <li>• Recommended (1)</li> </ul> | <ul style="list-style-type: none"> <li>• General public (5)</li> <li>• Physicians and healthcare workers (1)</li> </ul>                                            |
|                        | Community/faith-based organizations (1)        | March 19                                               | Mandatory (1)                                                                                | General public (1)                                                                                                                                                 |
|                        | Retail/commerce restrictions (7)               | March 19                                               | <ul style="list-style-type: none"> <li>• Mandatory (6)</li> <li>• Recommended (1)</li> </ul> | General public (7)                                                                                                                                                 |
|                        | Border and travel measures (2)                 | April 24                                               | Mandatory (2)                                                                                | Indigenous peoples (2)                                                                                                                                             |
| Social services (1)    | March 23                                       | Mandatory (1)                                          | General public (1)                                                                           |                                                                                                                                                                    |
| MB                     | <b>PUBLIC COMMUNICATION AND EDUCATION</b>      |                                                        |                                                                                              |                                                                                                                                                                    |
|                        | Voluntary self-isolation (3)                   | March 16                                               | Mandatory (3)                                                                                | <ul style="list-style-type: none"> <li>• General public (1)</li> <li>• Physicians and health care workers (2)</li> </ul>                                           |
|                        | Voluntary home quarantine (2)                  | March 16                                               | Mandatory (3)                                                                                | <ul style="list-style-type: none"> <li>• General public (1)</li> <li>• Physicians and health care workers (2)</li> </ul>                                           |
|                        | Use of masks (1)                               | April 21                                               | Recommended (1)                                                                              | General public (1)                                                                                                                                                 |

| Province/<br>Territory | Category of related public health measures (n)         | Date of initial public health measurement announcement | Level of implementation (n)                                                                  | Target Population (n)                                                                                                                                 |
|------------------------|--------------------------------------------------------|--------------------------------------------------------|----------------------------------------------------------------------------------------------|-------------------------------------------------------------------------------------------------------------------------------------------------------|
|                        | <b>PUBLIC HEALTH ORDERS</b>                            |                                                        |                                                                                              |                                                                                                                                                       |
|                        | Environmental cleaning (public spaces) (2)             | April 20                                               | Mandatory (2)                                                                                | General public (2)                                                                                                                                    |
|                        | Physical distancing (8)                                | March 20                                               | <ul style="list-style-type: none"> <li>• Mandatory (4)</li> <li>• Recommended (4)</li> </ul> | <ul style="list-style-type: none"> <li>• General public (7)</li> <li>• Adults (17 to 65 years) (1)</li> </ul>                                         |
|                        | School closures (1)                                    | April 20                                               | Mandatory (1)                                                                                | Children (<17 years old) (1)                                                                                                                          |
|                        | Childcare closures (1)                                 | April 14                                               | Recommended (1)                                                                              | Children (<17 years old) (1)                                                                                                                          |
|                        | Assisted living facilities (2)                         | March 16                                               | Mandatory (2)                                                                                | Physical illness/chronic disease populations (2)                                                                                                      |
|                        | Health care settings (5)                               | March 16                                               | <ul style="list-style-type: none"> <li>• Mandatory (3)</li> <li>• Recommended (2)</li> </ul> | <ul style="list-style-type: none"> <li>• Physicians and healthcare workers (3)</li> <li>• Physical illness/chronic disease populations (2)</li> </ul> |
|                        | Community/faith-based organizations (1)                | March 20                                               | Mandatory (1)                                                                                | General public (1)                                                                                                                                    |
|                        | Retail/commerce restrictions (10)                      | March 20                                               | <ul style="list-style-type: none"> <li>• Mandatory (8)</li> <li>• Recommended (2)</li> </ul> | <ul style="list-style-type: none"> <li>• General public (9)</li> <li>• Adults (17 and 65 years old) (1)</li> </ul>                                    |
|                        | Remote and isolated communities (1)                    | April 17                                               | Mandatory (1)                                                                                | General public (1)                                                                                                                                    |
|                        | Border and travel measures (3)                         | March 16                                               | <ul style="list-style-type: none"> <li>• Mandatory (2)</li> <li>• Recommended (1)</li> </ul> | General public (3)                                                                                                                                    |
|                        | Case and contact management (6)                        | April 17                                               | Recommended (6)                                                                              | General public (6)                                                                                                                                    |
|                        | Justice services (3)                                   | March 16                                               | Mandatory (3)                                                                                | <ul style="list-style-type: none"> <li>• General public (1)</li> <li>• Inmates (2)</li> </ul>                                                         |
|                        | Social services (1)                                    | April 10                                               | Recommended (1)                                                                              | Homeless population (1)                                                                                                                               |
| ON                     | <b>PUBLIC COMMUNICATION AND EDUCATION</b>              |                                                        |                                                                                              |                                                                                                                                                       |
|                        | Voluntary home quarantine (1)                          | March 30                                               | Recommended (1)                                                                              | General public (1)                                                                                                                                    |
|                        | Environmental cleaning (home/personal environment) (1) | April 2                                                | Mandatory (1)                                                                                | General public (1)                                                                                                                                    |
|                        | <b>PUBLIC HEALTH ORDERS</b>                            |                                                        |                                                                                              |                                                                                                                                                       |
|                        | Environmental cleaning (public spaces) (5)             | March 15                                               | Mandatory (5)                                                                                | General public (5)                                                                                                                                    |
|                        | Physical distancing (3)                                | March 18                                               | <ul style="list-style-type: none"> <li>• Mandatory (2)</li> </ul>                            | General public (3)                                                                                                                                    |

| Province/<br>Territory | Category of related public health measures (n) | Date of initial public health measurement announcement | Level of implementation (n)                                                                  | Target Population (n)                                                                                                                                                 |
|------------------------|------------------------------------------------|--------------------------------------------------------|----------------------------------------------------------------------------------------------|-----------------------------------------------------------------------------------------------------------------------------------------------------------------------|
|                        |                                                |                                                        | • Recommended (1)                                                                            |                                                                                                                                                                       |
|                        | School closures (4)                            | March 12                                               | Mandatory (4)                                                                                | Children (<17 years old) (4)                                                                                                                                          |
|                        | University closures (1)                        | March 13                                               | Mandatory (1)                                                                                | Adults (17 to 65 years old) (1)                                                                                                                                       |
|                        | Cancellation of mass gatherings (4)            | March 13                                               | Mandatory (4)                                                                                | General public (4)                                                                                                                                                    |
|                        | Assisted living facilities (7)                 | March 16                                               | Mandatory (7)                                                                                | <ul style="list-style-type: none"> <li>• General public (1)</li> <li>• Physicians and healthcare workers (5)</li> <li>• Vulnerable populations (1)</li> </ul>         |
|                        | Workplace (remote work) (3)                    | March 21                                               | Mandatory (3)                                                                                | Adults (17 to 65 years old) (3)                                                                                                                                       |
|                        | Health care settings (5)                       | March 15                                               | <ul style="list-style-type: none"> <li>• Mandatory (4)</li> <li>• Recommended (1)</li> </ul> | <ul style="list-style-type: none"> <li>• Physicians and health care workers (4)</li> <li>• Physical illness/chronic populations (1)</li> </ul>                        |
|                        | Community/faith-based organizations (1)        | April 23                                               | Mandatory (1)                                                                                | General public (1)                                                                                                                                                    |
|                        | Retail/commerce restrictions (3)               | March 17                                               | Mandatory (3)                                                                                | General public (1)                                                                                                                                                    |
|                        | Case and contact management measures (4)       | March 11                                               | <ul style="list-style-type: none"> <li>• Mandatory (3)</li> <li>• Recommended (1)</li> </ul> | <ul style="list-style-type: none"> <li>• General public (3)</li> <li>• Priority groups (details not provided) (1)</li> </ul>                                          |
|                        | Justice services (4)                           | March 13                                               | Mandatory (4)                                                                                | <ul style="list-style-type: none"> <li>• Inmates (2)</li> <li>• Inmates and visitors (1)</li> <li>• Individuals charged with an offence (1)</li> </ul>                |
|                        | Government services (3)                        | March 19                                               | Mandatory (3)                                                                                | <ul style="list-style-type: none"> <li>• General public (1)</li> <li>• Adults (17 to 65 years old) (1)</li> <li>• Physical illness/chronic populations (1)</li> </ul> |
|                        | Social services (1)                            | April 23, 2020                                         | Mandatory (1)                                                                                | Adults (17 and 65 years old) (1)                                                                                                                                      |
| QC                     | <b>PUBLIC COMMUNICATION AND EDUCATION</b>      |                                                        |                                                                                              |                                                                                                                                                                       |
|                        | Hand hygiene (4)                               | January 30                                             | Recommended (4)                                                                              | General public (4)                                                                                                                                                    |
|                        | Respiratory etiquette (4)                      | January 30                                             | <ul style="list-style-type: none"> <li>• Mandatory (1)</li> <li>• Recommended (3)</li> </ul> | General public (3)                                                                                                                                                    |
|                        | Voluntary self-isolation (11)                  | February 7                                             | <ul style="list-style-type: none"> <li>• Mandatory (8)</li> <li>• Recommended (3)</li> </ul> | <ul style="list-style-type: none"> <li>• General public (9)</li> <li>• Adults (17 to 65 years old) (1)</li> </ul>                                                     |

| Province/<br>Territory      | Category of related public health measures (n) | Date of initial public health measurement announcement | Level of implementation (n)           | Target Population (n)                                                                                                              |
|-----------------------------|------------------------------------------------|--------------------------------------------------------|---------------------------------------|------------------------------------------------------------------------------------------------------------------------------------|
|                             |                                                |                                                        |                                       | • Seniors (>65 years old) (1)                                                                                                      |
|                             | Voluntary home quarantine (14)                 | February 7                                             | • Mandatory (7)<br>• Recommended (7)  | • General public (10)<br>• Adults (17 to 65 years old) (1)<br>• Seniors (>65 years old) (4)                                        |
|                             | Use of masks (2)                               | April 7                                                | Recommended (2)                       | General public (2)                                                                                                                 |
| <b>PUBLIC HEALTH ORDERS</b> |                                                |                                                        |                                       |                                                                                                                                    |
|                             | Physical distancing (4)                        | March 15                                               | • Mandatory (3)<br>• Recommended (1)  | General public (4)                                                                                                                 |
|                             | School closures (4)                            | March 13                                               | Mandatory (4)                         | Children (<17 years old) (4)                                                                                                       |
|                             | University closures (1)                        | March 13                                               | Mandatory (1)                         | Adults (17 to 65 years old) (1)                                                                                                    |
|                             | Childcare closures (1)                         | April 27                                               | Mandatory (1)                         | Children (<17 years old) (1)                                                                                                       |
|                             | Cancellation of mass gatherings (8)            | March 11                                               | Mandatory (8)                         | • General public (7)<br>• Children (<17 years old) (1)                                                                             |
|                             | Assisted living facilities (6)                 | March 12                                               | • Mandatory (3)<br>• Recommended (3)  | • General public (1)<br>• Physicians and healthcare workers (2)<br>• Seniors (>65 years old) (2)<br>• Children (<17 years old) (1) |
|                             | Workplace (remote work) (2)                    | March 13                                               | Mandatory (2)                         | Adults (17 to 65 years old) (2)                                                                                                    |
|                             | Health care settings (2)                       | March 14                                               | Mandatory (2)                         | General public (2)                                                                                                                 |
|                             | Community/faith-based organizations (1)        | March 16                                               | Mandatory (1)                         | General public (1)                                                                                                                 |
|                             | Retail/commerce restrictions (12)              | March 13                                               | • Mandatory (10)<br>• Recommended (2) | • General public (10)<br>• Adults (17 to 65 years old) (2)                                                                         |
|                             | Border and travel measures (8)                 | March 11                                               | • Mandatory (6)<br>• Recommended (2)  | • General public (7)<br>• Adults (17 to 65 years old) (1)                                                                          |
|                             | Government services (4)                        | March 17                                               | Mandatory (4)                         | • General public (2)<br>• Adults (17 to 65 years old) (1)<br>• Children (<17 years old) (1)                                        |
|                             | Social services (2)                            | March 15                                               | Mandatory (2)                         | • Children (<17 years old) (1)<br>• Victims of domestic violence (1)                                                               |

| Province/<br>Territory  | Category of related public health measures (n) | Date of initial public health measurement announcement | Level of implementation (n)                                                                   | Target Population (n)                                                                                                                                                                                          |
|-------------------------|------------------------------------------------|--------------------------------------------------------|-----------------------------------------------------------------------------------------------|----------------------------------------------------------------------------------------------------------------------------------------------------------------------------------------------------------------|
| NS                      | <b>PUBLIC COMMUNICATION AND EDUCATION</b>      |                                                        |                                                                                               |                                                                                                                                                                                                                |
|                         | Voluntary self-isolation (1)                   | March 19                                               | Mandatory (1)                                                                                 | General public (1)                                                                                                                                                                                             |
|                         | Voluntary home quarantine (1)                  | March 22                                               | Recommended (1)                                                                               | Seniors (>65 years old) (1)                                                                                                                                                                                    |
|                         | <b>PUBLIC HEALTH ORDERS</b>                    |                                                        |                                                                                               |                                                                                                                                                                                                                |
|                         | Physical distancing measures (1)               | March 22                                               | Mandatory (1)                                                                                 | Physicians and healthcare workers (1)                                                                                                                                                                          |
|                         | School closures (3)                            | March 30                                               | Mandatory (3)                                                                                 | Children (<17 years old) (3)                                                                                                                                                                                   |
|                         | University closures (1)                        | March 19                                               | Mandatory (1)                                                                                 | Adults (17 to 65 years old) (1)                                                                                                                                                                                |
|                         | Childcare closure (1)                          | April 28                                               | Mandatory (1)                                                                                 | Children (<17 years old) (1)                                                                                                                                                                                   |
|                         | Cancellation of mass gatherings (1)            | March 17                                               | Mandatory (1)                                                                                 | General public (1)                                                                                                                                                                                             |
|                         | Assisted living facilities (3)                 | March 27                                               | Mandatory (3)                                                                                 | <ul style="list-style-type: none"> <li>• Physicians and healthcare workers (1)</li> <li>• Seniors (&gt;65 years old) (1)</li> <li>• Vulnerable populations (1)</li> </ul>                                      |
|                         | Health care settings (3)                       | March 18                                               | <ul style="list-style-type: none"> <li>• Mandatory (1)</li> <li>• Recommended (2)</li> </ul>  | <ul style="list-style-type: none"> <li>• General public (1)</li> <li>• Physicians and healthcare workers (2)</li> </ul>                                                                                        |
|                         | Retail/commerce restrictions (7)               | March 13                                               | Mandatory (7)                                                                                 | <ul style="list-style-type: none"> <li>• General public (6)</li> <li>• Adults (17 to 65 years old) (1)</li> </ul>                                                                                              |
|                         | Boarder and travel measures (3)                | March 4                                                | Mandatory (3)                                                                                 | <ul style="list-style-type: none"> <li>• General public (1)</li> <li>• Adults (17 to 65 years old) (2)</li> </ul>                                                                                              |
|                         | Case and contact management measures (2)       | April 5                                                | Mandatory (2)                                                                                 | General public (2)                                                                                                                                                                                             |
|                         | Justice services (2)                           | March 14                                               | Mandatory (2)                                                                                 | General public (2)                                                                                                                                                                                             |
| Government services (2) | March 17                                       | Mandatory (2)                                          | Adults (17 to 65 years old) (2)                                                               |                                                                                                                                                                                                                |
| NB                      | <b>PUBLIC COMMUNICATION AND EDUCATION</b>      |                                                        |                                                                                               |                                                                                                                                                                                                                |
|                         | Hand hygiene (4)                               | March 5                                                | <ul style="list-style-type: none"> <li>• Mandatory (1)</li> <li>• Recommended (3)</li> </ul>  | <ul style="list-style-type: none"> <li>• General public (3)</li> <li>• Clients and staff in homeless shelters (1)</li> </ul>                                                                                   |
|                         | Respiratory etiquette (1)                      | March 5                                                | Recommended (1)                                                                               | General public (1)                                                                                                                                                                                             |
|                         | Voluntary self-isolation (16)                  | March 5                                                | <ul style="list-style-type: none"> <li>• Mandatory (2)</li> <li>• Recommended (14)</li> </ul> | <ul style="list-style-type: none"> <li>• General public (12)</li> <li>• Physicians and health care workers (2)</li> <li>• Adults (17 to 65 years old) (1)</li> <li>• Seniors (&gt;65 years old) (1)</li> </ul> |



| Province/<br>Territory      | Category of related public health measures (n) | Date of initial public health measurement announcement | Level of implementation (n)                                                                   | Target Population (n)                                                                                                                                                                                          |
|-----------------------------|------------------------------------------------|--------------------------------------------------------|-----------------------------------------------------------------------------------------------|----------------------------------------------------------------------------------------------------------------------------------------------------------------------------------------------------------------|
|                             | Voluntary home quarantine (16)                 | March 5                                                | <ul style="list-style-type: none"> <li>• Mandatory (2)</li> <li>• Recommended (14)</li> </ul> | <ul style="list-style-type: none"> <li>• General public (12)</li> <li>• Physicians and health care workers (2)</li> <li>• Adults (17 to 65 years old) (1)</li> <li>• Seniors (&gt;65 years old) (1)</li> </ul> |
|                             | Use of masks (2)                               | April 1                                                | Recommended (2)                                                                               | General public (2)                                                                                                                                                                                             |
| <b>PUBLIC HEALTH ORDERS</b> |                                                |                                                        |                                                                                               |                                                                                                                                                                                                                |
|                             | Environmental cleaning (public spaces) (11)    | March 13                                               | Mandatory (11)                                                                                | <ul style="list-style-type: none"> <li>• General public (10)</li> <li>• Children (&lt;17 years old) (1)</li> </ul>                                                                                             |
|                             | Physical distancing measures (13)              | March 12                                               | <ul style="list-style-type: none"> <li>• Mandatory (5)</li> <li>• Recommended (8)</li> </ul>  | <ul style="list-style-type: none"> <li>• General public (10)</li> <li>• Children (&lt;17 years old) (2)</li> <li>• Adults (17 to 65 years old) (1)</li> </ul>                                                  |
|                             | School closures (2)                            | March 13                                               | Mandatory (2)                                                                                 | Children (<17 years old) (2)                                                                                                                                                                                   |
|                             | University closures (2)                        | March 19                                               | Mandatory (2)                                                                                 | Adults (17 to 65 years old) (2)                                                                                                                                                                                |
|                             | Childcare closures (2)                         | March 13                                               | Mandatory (2)                                                                                 | Children (<17 years old) (2)                                                                                                                                                                                   |
|                             | Cancellation of mass gatherings (3)            | March 12                                               | Mandatory (3)                                                                                 | General public (3)                                                                                                                                                                                             |
|                             | Assisted living facilities (6)                 | March 9                                                | <ul style="list-style-type: none"> <li>• Mandatory (4)</li> <li>• Recommended (2)</li> </ul>  | <ul style="list-style-type: none"> <li>• General public (2)</li> <li>• Physicians and healthcare workers (1)</li> <li>• Seniors (&gt;65 years old) (3)</li> </ul>                                              |
|                             | Workplace (remote work) (5)                    | March 16                                               | <ul style="list-style-type: none"> <li>• Mandatory (1)</li> <li>• Recommended (4)</li> </ul>  | Adults (17 to 65 years old) (5)                                                                                                                                                                                |
|                             | Health care settings (10)                      | March 11                                               | <ul style="list-style-type: none"> <li>• Mandatory (3)</li> <li>• Recommended (7)</li> </ul>  | <ul style="list-style-type: none"> <li>• General public (3)</li> <li>• Physicians and health care workers (7)</li> </ul>                                                                                       |
|                             | Community/faith-based organizations (4)        | March 12                                               | <ul style="list-style-type: none"> <li>• Mandatory (1)</li> <li>• Recommended (3)</li> </ul>  | General public (4)                                                                                                                                                                                             |
|                             | Retail/commerce restrictions (9)               | March 16                                               | <ul style="list-style-type: none"> <li>• Mandatory (6)</li> <li>• Recommended (3)</li> </ul>  | <ul style="list-style-type: none"> <li>• General public (8)</li> <li>• Adults (17 to 65 years old) (1)</li> </ul>                                                                                              |
|                             | Border and travel measures (7)                 | March 18                                               | <ul style="list-style-type: none"> <li>• Mandatory (4)</li> <li>• Recommended (3)</li> </ul>  | <ul style="list-style-type: none"> <li>• General public (6)</li> <li>• Adults (17 to 65 years old) (1)</li> </ul>                                                                                              |

| Province/<br>Territory | Category of related public health measures (n) | Date of initial public health measurement announcement | Level of implementation (n)                                                                  | Target Population (n)                                                                                                                                                           |
|------------------------|------------------------------------------------|--------------------------------------------------------|----------------------------------------------------------------------------------------------|---------------------------------------------------------------------------------------------------------------------------------------------------------------------------------|
|                        | Case and contact management measures (10)      | March 15                                               | <ul style="list-style-type: none"> <li>• Mandatory (3)</li> <li>• Recommended (7)</li> </ul> | <ul style="list-style-type: none"> <li>• General public (8)</li> <li>• Physicians and health care workers (2)</li> </ul>                                                        |
|                        | Justice services (3)                           | March 13                                               | Mandatory (3)                                                                                | General public (3)                                                                                                                                                              |
|                        | Government services (8)                        | March 17                                               | <ul style="list-style-type: none"> <li>• Mandatory (7)</li> <li>• Recommended (1)</li> </ul> | <ul style="list-style-type: none"> <li>• General public (7)</li> <li>• Children (&lt;17 years old) (1)</li> </ul>                                                               |
|                        | Social services (3)                            | March 18                                               | Recommended (3)                                                                              | <ul style="list-style-type: none"> <li>• General public (1)</li> <li>• Children (&lt;17 years old) (1)</li> <li>• Homeless population (1)</li> </ul>                            |
| PEI                    | <b>PUBLIC COMMUNICATION AND EDUCATION</b>      |                                                        |                                                                                              |                                                                                                                                                                                 |
|                        | Hand hygiene (1)                               | February 28                                            | Recommended (1)                                                                              | General public (1)                                                                                                                                                              |
|                        | Voluntary self-isolation (10)                  | February 28                                            | <ul style="list-style-type: none"> <li>• Mandatory (4)</li> <li>• Recommended (6)</li> </ul> | <ul style="list-style-type: none"> <li>• General public (9)</li> <li>• Children (&lt;17 years old) (1)</li> </ul>                                                               |
|                        | Voluntary home quarantine (10)                 | February 28                                            | <ul style="list-style-type: none"> <li>• Mandatory (4)</li> <li>• Recommended (6)</li> </ul> | <ul style="list-style-type: none"> <li>• General public (9)</li> <li>• Children (&lt;17 years old) (1)</li> </ul>                                                               |
|                        | Use of masks (1)                               | April 6                                                | Recommended (1)                                                                              | General public (1)                                                                                                                                                              |
|                        | <b>PUBLIC HEALTH ORDERS</b>                    |                                                        |                                                                                              |                                                                                                                                                                                 |
|                        | Environmental cleaning (public spaces) (1)     | March 17                                               | Mandatory (1)                                                                                | General public (1)                                                                                                                                                              |
|                        | Physical distancing measures (3)               | March 13                                               | <ul style="list-style-type: none"> <li>• Mandatory (2)</li> <li>• Recommended (1)</li> </ul> | General public (3)                                                                                                                                                              |
|                        | School closures (2)                            | March 27                                               | Mandatory (2)                                                                                | Children <17 years old (2)                                                                                                                                                      |
|                        | Childcare closures (3)                         | March 15                                               | Mandatory (3)                                                                                | Children <17 years old (3)                                                                                                                                                      |
|                        | Cancellation of mass gatherings (2)            | April 9                                                | Mandatory (2)                                                                                | General public (2)                                                                                                                                                              |
|                        | Assisted living facilities (1)                 | March 15                                               | Mandatory (1)                                                                                | General public (1)                                                                                                                                                              |
|                        | Workplace (remote work) (3)                    | March 16                                               | <ul style="list-style-type: none"> <li>• Mandatory (1)</li> <li>• Recommended (2)</li> </ul> | General public (3)                                                                                                                                                              |
|                        | Health care settings (7)                       | March 15                                               | Mandatory (7)                                                                                | <ul style="list-style-type: none"> <li>• General public (1)</li> <li>• Physical illness/chronic populations (3)</li> <li>• Population with mental health illness (3)</li> </ul> |

| Province/<br>Territory | Category of related public health measures (n) | Date of initial public health measurement announcement | Level of implementation (n)                                                                  | Target Population (n)                                                                                                                            |
|------------------------|------------------------------------------------|--------------------------------------------------------|----------------------------------------------------------------------------------------------|--------------------------------------------------------------------------------------------------------------------------------------------------|
|                        | Retail/commerce restrictions (7)               | March 17                                               | <ul style="list-style-type: none"> <li>• Mandatory (6)</li> <li>• Recommended (1)</li> </ul> | <ul style="list-style-type: none"> <li>• General public (6)</li> <li>• Seniors (&gt;65 years old) (1)</li> </ul>                                 |
|                        | Border and travel measures (7)                 | March 10                                               | <ul style="list-style-type: none"> <li>• Mandatory (5)</li> <li>• Recommended (2)</li> </ul> | <ul style="list-style-type: none"> <li>• General public (6)</li> <li>• Children (&lt;17 years old) (1)</li> </ul>                                |
|                        | Case and contact management measures (1)       | April 23                                               | Mandatory (1)                                                                                | Physicians and health care workers (1)                                                                                                           |
|                        | Government services (2)                        | March 17                                               | Mandatory (2)                                                                                | <ul style="list-style-type: none"> <li>• General public (1)</li> <li>• Adults (17 to 65 years old) (1)</li> </ul>                                |
|                        | Social services (1)                            | March 24                                               | Recommended (1)                                                                              | General public (1)                                                                                                                               |
| NL                     | <b>PUBLIC COMMUNICATION AND EDUCATION</b>      |                                                        |                                                                                              |                                                                                                                                                  |
|                        | Voluntary self-isolation (3)                   | March 22                                               | Recommended (3)                                                                              | General public (3)                                                                                                                               |
|                        | Voluntary home quarantine (3)                  | March 22                                               | Recommended (3)                                                                              | General public (3)                                                                                                                               |
|                        | <b>PUBLIC HEALTH ORDERS</b>                    |                                                        |                                                                                              |                                                                                                                                                  |
|                        | Environmental cleaning (public spaces) (6)     | March 13                                               | Mandatory (6)                                                                                | General public (6)                                                                                                                               |
|                        | Physical distancing measures (2)               | March 19                                               | <ul style="list-style-type: none"> <li>• Mandatory (1)</li> <li>• Recommended (1)</li> </ul> | General public (2)                                                                                                                               |
|                        | School closures (1)                            | April 2                                                | Mandatory (1)                                                                                | Children (<17 years old) (1)                                                                                                                     |
|                        | Childcare closures (3)                         | March 16                                               | Mandatory (3)                                                                                | Children (<17 years old) (3)                                                                                                                     |
|                        | Cancellation of mass gatherings (1)            | March 28                                               | Mandatory (1)                                                                                | General public (1)                                                                                                                               |
|                        | Assisted living facilities (1)                 | March 23                                               | Mandatory (1)                                                                                | Seniors (>65 years old) (1)                                                                                                                      |
|                        | Workplace (remote work) (2)                    | March 10                                               | <ul style="list-style-type: none"> <li>• Mandatory (1)</li> <li>• Recommended (1)</li> </ul> | Adults (17 to 65 years old) (2)                                                                                                                  |
|                        | Health care settings (3)                       | March 12                                               | <ul style="list-style-type: none"> <li>• Mandatory (2)</li> <li>• Recommended (1)</li> </ul> | <ul style="list-style-type: none"> <li>• Physicians and health care providers (1)</li> <li>• Physical illness/chronic populations (2)</li> </ul> |
|                        | Community/faith-based organizations (1)        | March 24                                               | Mandatory (1)                                                                                | General public (1)                                                                                                                               |
|                        | Retail/commerce restrictions (10)              | March 13                                               | <ul style="list-style-type: none"> <li>• Mandatory (8)</li> <li>• Recommended (2)</li> </ul> | General public (10)                                                                                                                              |

| Province/<br>Territory              | Category of related public health measures (n) | Date of initial public health measurement announcement                                       | Level of implementation (n)                                                                   | Target Population (n)                                                                                                                               |
|-------------------------------------|------------------------------------------------|----------------------------------------------------------------------------------------------|-----------------------------------------------------------------------------------------------|-----------------------------------------------------------------------------------------------------------------------------------------------------|
|                                     | Border and travel measures (5)                 | March 6                                                                                      | <ul style="list-style-type: none"> <li>• Mandatory (4)</li> <li>• Recommended (1)</li> </ul>  | <ul style="list-style-type: none"> <li>• General public (3)</li> <li>• Adults (17 to 65 years old) (2)</li> </ul>                                   |
|                                     | Case and contact management measures (1)       | March 22                                                                                     | Mandatory (1)                                                                                 | • General public (1)                                                                                                                                |
|                                     | Justice services (1)                           | March 16                                                                                     | Mandatory (1)                                                                                 | Inmates (1)                                                                                                                                         |
|                                     | Government services (9)                        | March 15                                                                                     | <ul style="list-style-type: none"> <li>• Mandatory (8)</li> <li>• Recommended (1)</li> </ul>  | <ul style="list-style-type: none"> <li>• General public (8)</li> <li>• Adults (17 to 65 years old) (1)</li> </ul>                                   |
|                                     | Social services (3)                            | March 23                                                                                     | Recommended (3)                                                                               | <ul style="list-style-type: none"> <li>• General public (1)</li> <li>• Seniors (&gt;65 years old) (1)</li> <li>• Homeless population (1)</li> </ul> |
| YK                                  | <b>PUBLIC COMMUNICATION AND EDUCATION</b>      |                                                                                              |                                                                                               |                                                                                                                                                     |
|                                     | Hand hygiene (3)                               | March 27                                                                                     | Recommended (3)                                                                               | General public (3)                                                                                                                                  |
|                                     | Respiratory etiquette (3)                      | March 30                                                                                     | <ul style="list-style-type: none"> <li>• Mandatory (1)</li> <li>• Recommended (2)</li> </ul>  | <ul style="list-style-type: none"> <li>• General public (2)</li> <li>• Adults (17 to 65 years old) (1)</li> </ul>                                   |
|                                     | Voluntary self-isolation (4)                   | March 27                                                                                     | <ul style="list-style-type: none"> <li>• Mandatory (3)</li> <li>• Recommended (1)</li> </ul>  | General public (4)                                                                                                                                  |
|                                     | Voluntary home quarantine (4)                  | March 27                                                                                     | <ul style="list-style-type: none"> <li>• Mandatory (3)</li> <li>• Recommended (1)</li> </ul>  | General public (4)                                                                                                                                  |
|                                     | Use of masks (1)                               | April 6                                                                                      | Recommended (1)                                                                               | General public (1)                                                                                                                                  |
|                                     | <b>PUBLIC HEALTH ORDERS</b>                    |                                                                                              |                                                                                               |                                                                                                                                                     |
|                                     | Physical distancing (12)                       | April 1                                                                                      | <ul style="list-style-type: none"> <li>• Mandatory (10)</li> <li>• Recommended (2)</li> </ul> | <ul style="list-style-type: none"> <li>• General public (11)</li> <li>• Adults (17 to 65 years old) (1)</li> </ul>                                  |
|                                     | School closures (1)                            | March 27                                                                                     | Mandatory (1)                                                                                 | Children (<17 years old) (1)                                                                                                                        |
|                                     | Childcare closures (2)                         | April 7                                                                                      | Mandatory (2)                                                                                 | Children (<17 years old) (2)                                                                                                                        |
|                                     | Cancellation of mass gatherings (1)            | April 3                                                                                      | Mandatory (1)                                                                                 | General public (1)                                                                                                                                  |
|                                     | Health care settings (2)                       | March 27                                                                                     | Mandatory (2)                                                                                 | General public (2)                                                                                                                                  |
|                                     | Retail/commerce restrictions (1)               | April 3                                                                                      | Mandatory (1)                                                                                 | General public (1)                                                                                                                                  |
| Remote and isolated communities (3) | March 30                                       | <ul style="list-style-type: none"> <li>• Mandatory (1)</li> <li>• Recommended (2)</li> </ul> | General public (3)                                                                            |                                                                                                                                                     |

| Province/<br>Territory         | Category of related public health measures (n) | Date of initial public health measurement announcement                                       | Level of implementation (n)                                                                                                                                                                                    | Target Population (n)                                                                                             |
|--------------------------------|------------------------------------------------|----------------------------------------------------------------------------------------------|----------------------------------------------------------------------------------------------------------------------------------------------------------------------------------------------------------------|-------------------------------------------------------------------------------------------------------------------|
|                                | Border and travel measures (6)                 | April 1                                                                                      | Mandatory (6)                                                                                                                                                                                                  | General public (6)                                                                                                |
|                                | Case and contact management measures (3)       | April 6                                                                                      | Mandatory (3)                                                                                                                                                                                                  | General public (3)                                                                                                |
|                                | Government services (2)                        | March 30                                                                                     | <ul style="list-style-type: none"> <li>• Mandatory (1)</li> <li>• Recommended (1)</li> </ul>                                                                                                                   | <ul style="list-style-type: none"> <li>• General public (1)</li> <li>• Adults (17 to 65 years old) (1)</li> </ul> |
|                                | Social services (1)                            | April 22                                                                                     | Recommended (1)                                                                                                                                                                                                | Adults (17 to 65 years old) (1)                                                                                   |
| NWT                            | <b>PUBLIC COMMUNICATION AND EDUCATION</b>      |                                                                                              |                                                                                                                                                                                                                |                                                                                                                   |
|                                | Respiratory etiquette (2)                      | February 5                                                                                   | Recommended (2)                                                                                                                                                                                                | General public (2)                                                                                                |
|                                | Voluntary self-isolation (13)                  | February 5                                                                                   | <ul style="list-style-type: none"> <li>• Mandatory (8)</li> <li>• Recommended (5)</li> </ul>                                                                                                                   | <ul style="list-style-type: none"> <li>• General public (8)</li> <li>• Adults (17 to 65 years old) (5)</li> </ul> |
|                                | Voluntary home quarantine (13)                 | February 5                                                                                   | <ul style="list-style-type: none"> <li>• Mandatory (8)</li> <li>• Recommended (5)</li> </ul>                                                                                                                   | <ul style="list-style-type: none"> <li>• General public (8)</li> <li>• Adults (17 to 65 years old) (5)</li> </ul> |
|                                | Use of masks (1)                               | April 27                                                                                     | Mandatory (1)                                                                                                                                                                                                  | Adults (17 to 65 years old) (1)                                                                                   |
|                                | <b>PUBLIC HEALTH ORDERS</b>                    |                                                                                              |                                                                                                                                                                                                                |                                                                                                                   |
|                                | Environmental cleaning (public spaces) (1)     | April 10                                                                                     | Mandatory (1)                                                                                                                                                                                                  | General public (1)                                                                                                |
|                                | Physical distancing measures (10)              | March 16                                                                                     | <ul style="list-style-type: none"> <li>• Mandatory (5)</li> <li>• Recommended (5)</li> </ul>                                                                                                                   | <ul style="list-style-type: none"> <li>• General public (7)</li> <li>• Adults (17 to 65 years old) (3)</li> </ul> |
|                                | School closures (2)                            | March 16                                                                                     | Mandatory (2)                                                                                                                                                                                                  | Children (<17 years old) (2)                                                                                      |
|                                | Childcare closures (1)                         | April 24                                                                                     | Mandatory (1)                                                                                                                                                                                                  | Children (<17 years old) (1)                                                                                      |
|                                | Cancellation of mass gatherings (1)            | April 10                                                                                     | Mandatory (1)                                                                                                                                                                                                  | General public (1)                                                                                                |
|                                | Assisted living facilities (1)                 | March 16                                                                                     | Mandatory (1)                                                                                                                                                                                                  | Physicians and healthcare workers (1)                                                                             |
|                                | Workplace (remote work) (2)                    | March 14                                                                                     | Mandatory (2)                                                                                                                                                                                                  | Adults (17 to 65 years old) (2)                                                                                   |
|                                | Health care settings (1)                       | March 16                                                                                     | Mandatory (1)                                                                                                                                                                                                  | Physicians and health care workers (1)                                                                            |
|                                | Retail/commerce restrictions (1)               | April 10                                                                                     | Mandatory (1)                                                                                                                                                                                                  | General public (1)                                                                                                |
| Border and travel measures (6) | March 16                                       | <ul style="list-style-type: none"> <li>• Mandatory (4)</li> <li>• Recommended (2)</li> </ul> | <ul style="list-style-type: none"> <li>• General public (3)</li> <li>• Physicians and health care workers (1)</li> <li>• Adults (17 to 65 years old) (1)</li> <li>• Children (&lt;17 years old) (1)</li> </ul> |                                                                                                                   |

| Province/<br>Territory | Category of related public health measures (n)         | Date of initial public health measurement announcement | Level of implementation (n)                                                                  | Target Population (n)                                                                                              |
|------------------------|--------------------------------------------------------|--------------------------------------------------------|----------------------------------------------------------------------------------------------|--------------------------------------------------------------------------------------------------------------------|
|                        | Case and contact management measures (3)               | March 14                                               | Mandatory (3)                                                                                | General public (3)                                                                                                 |
|                        | Justice services (1)                                   | April 22                                               | Mandatory (1)                                                                                | Inmates (1)                                                                                                        |
| NU                     | <b>PUBLIC COMMUNICATION AND EDUCATION</b>              |                                                        |                                                                                              |                                                                                                                    |
|                        | Hand hygiene (1)                                       | March 4                                                | Recommended (1)                                                                              | General public (1)                                                                                                 |
|                        | Respiratory etiquette (1)                              | March 4                                                | Recommended (1)                                                                              | General public (1)                                                                                                 |
|                        | Environmental cleaning (home/personal environment) (1) | March 11                                               | Recommended (1)                                                                              | General public (1)                                                                                                 |
|                        | Voluntary self-isolation (2)                           | March 18                                               | Mandatory (2)                                                                                | <ul style="list-style-type: none"> <li>• General public (1)</li> <li>• Adults (17 to 65 years old) (1)</li> </ul>  |
|                        | Voluntary home quarantine (2)                          | March 18                                               | Mandatory (2)                                                                                | <ul style="list-style-type: none"> <li>• General public (1)</li> <li>• Students (1)</li> </ul>                     |
|                        | Use of masks (1)                                       | April 29                                               | Recommended (1)                                                                              | General public (1)                                                                                                 |
|                        | <b>PUBLIC HEALTH ORDERS</b>                            |                                                        |                                                                                              |                                                                                                                    |
|                        | Environmental cleaning (public spaces) (2)             | March 13                                               | Mandatory (2)                                                                                | <ul style="list-style-type: none"> <li>• General public (1)</li> <li>• Adults (17 and 65 years old) (1)</li> </ul> |
|                        | Physical distancing measures (5)                       | March 4                                                | <ul style="list-style-type: none"> <li>• Mandatory (1)</li> <li>• Recommended (4)</li> </ul> | <ul style="list-style-type: none"> <li>• General public (3)</li> <li>• Adults (17 and 65 years old) (2)</li> </ul> |
|                        | School closures (2)                                    | March 16                                               | Mandatory (2)                                                                                | Children (<17 years old) (2)                                                                                       |
|                        | Childcare closures (2)                                 | March 16                                               | Mandatory (2)                                                                                | Children (<17 years old) (2)                                                                                       |
|                        | Cancellation of mass gatherings (1)                    | March 13                                               | Mandatory (1)                                                                                | General public (1)                                                                                                 |
|                        | Workplace (remote work) (4)                            | March 16                                               | Mandatory (4)                                                                                | Adults (17 and 65 years old) (4)                                                                                   |
|                        | Border and travel measures (3)                         | March 4                                                | Mandatory (3)                                                                                | General public (3)                                                                                                 |
|                        | Case and contact management measures (1)               | April 30                                               | Mandatory (1)                                                                                | General public (1)                                                                                                 |
|                        | Government services (1)                                | March 30                                               | Mandatory (1)                                                                                | General public (1)                                                                                                 |
| Social services (1)    | March 19                                               | Mandatory (1)                                          | Homeless population (1)                                                                      |                                                                                                                    |

AB=Alberta; BC=British Columbia; LTC=Long-term care; MB=Manitoba; NA=Not applicable; NB=New Brunswick; NL=Newfoundland and Labrador; NWT=Northwest Territories; NS=Nova Scotia; NU=Nunavut; ON=Ontario; PEI=Prince Edward Island; QC=Quebec; SK=Saskatchewan; YU=Yukon.
